# Supplementary material for: Combining field performance with controlled environment plant imaging to identify the genetic control of growth and transpiration underlying yield response to water-deficit stress in wheat
Source: PubMed Central journal article supplement (PMC4585424; doi:10.1093/jxb/erv320), 2015-07-15

**Combining field performance with controlled environment plant imaging to identify the genetic control of growth and transpiration underlying yield response to water deficit stress in wheat**

Boris Parent, Fahimeh Shahinnia, Lance Maphosa, Bettina Berger, Huwaida Rabie, Ken Chalmers, Alex Kovalchuk, Peter Langridge, and Delphine Fleury

*Supplemental Figures*

## Supplementary Figure 1

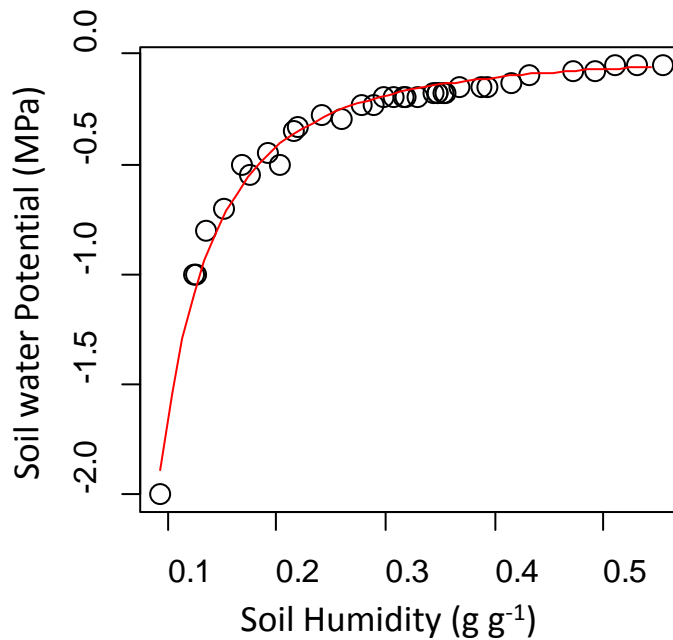

**Supplementary Fig.1:** *Water release curve of experiment in the imaging platform.*

Soil water content was measured by automatically weighing columns. Predawn leaf water potential was measured on non-expanding leaves, placed into a Scholander-type pressure chamber (Soil Moisture Equipment Corp., Santa Barbara, USA). Soil Humidity was derived from pot weight and soil dry weight. A Van Genuchten curve was fitted to these data.

Key colour

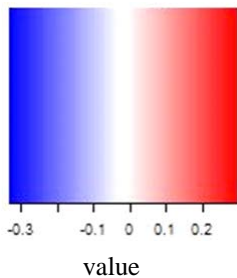

### Well-watered (platform) vs. polytunnel (field)

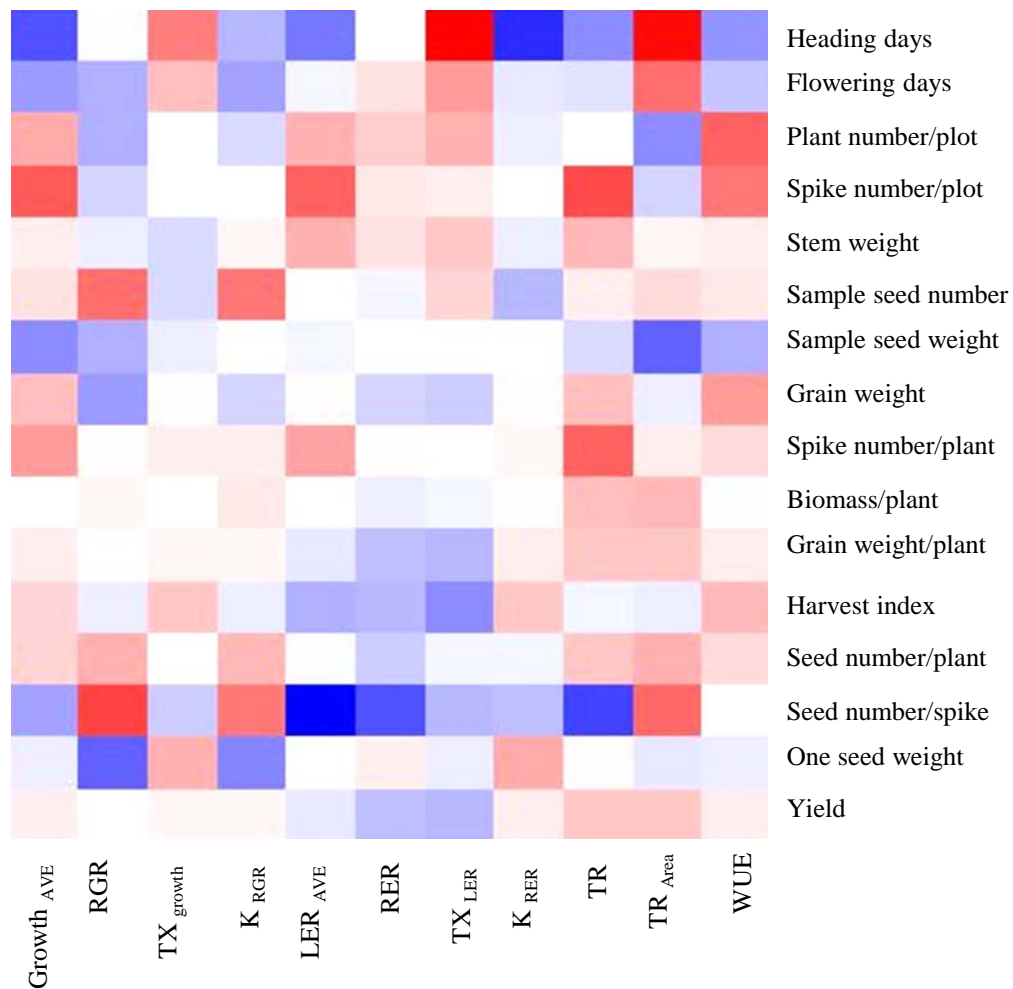

Key colour

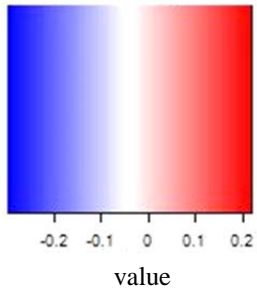

### Water deficit (platform) vs. polytunnel (field)

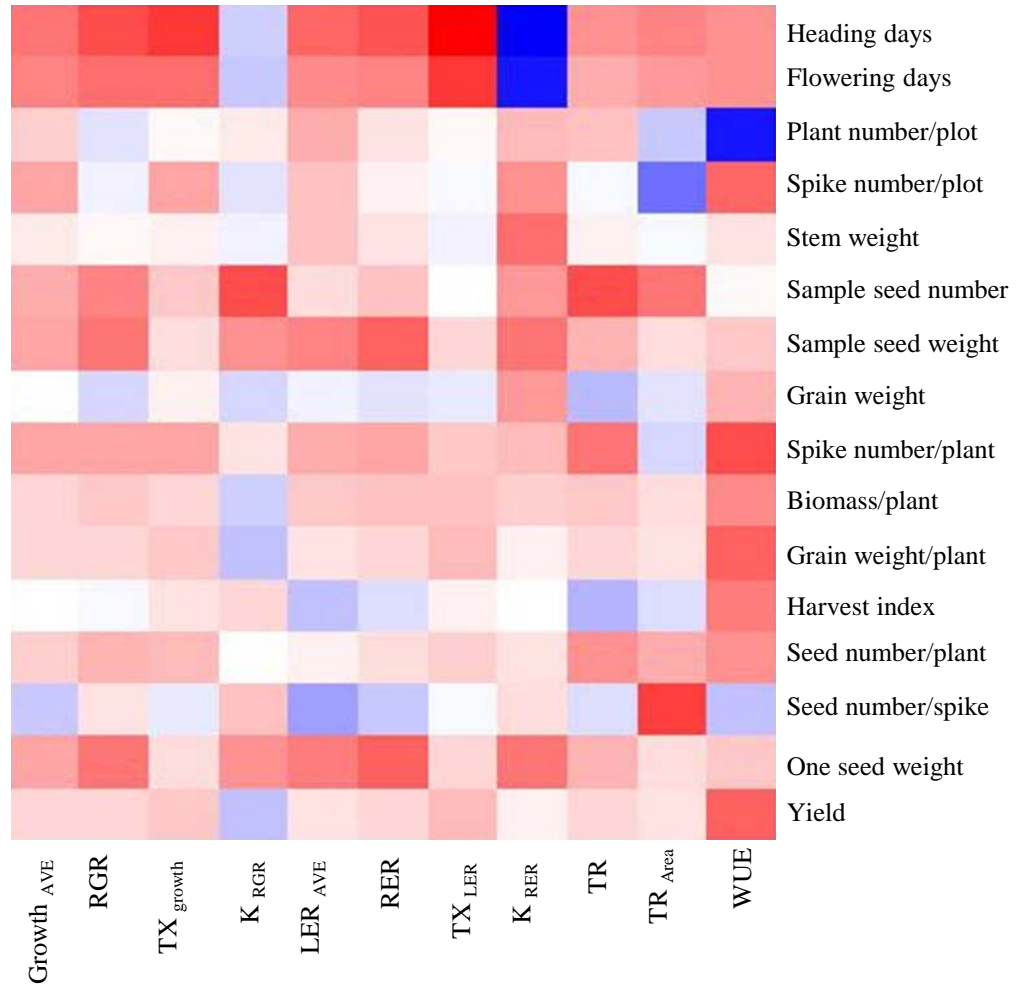

Supplement: supp_erv320_jexbot148254_file002.pdf [file supp_erv320_jexbot148254_file002.pdf]
